# Supplementary material
Source: PubMed Central journal article supplement (PMC2877549)

Templeton et al.

**Figure S1 (A-F). Bacterial-affinity** of selected Ascogregarina proteins as inferred by maximum likelihood (ML) analysis (with PROML in the PHYLIP package). Best ML trees are inferred using a JTT amino acid substitution model with the consideration of fraction of invariance (Finv) and 4-rate gamma distribution. Sequences were added randomly with 10 jumps of searches and enabled global rearrangement.

**A) Type-E Alcohol Dehydrogenase (adh-E)**  
(175 aa positions)

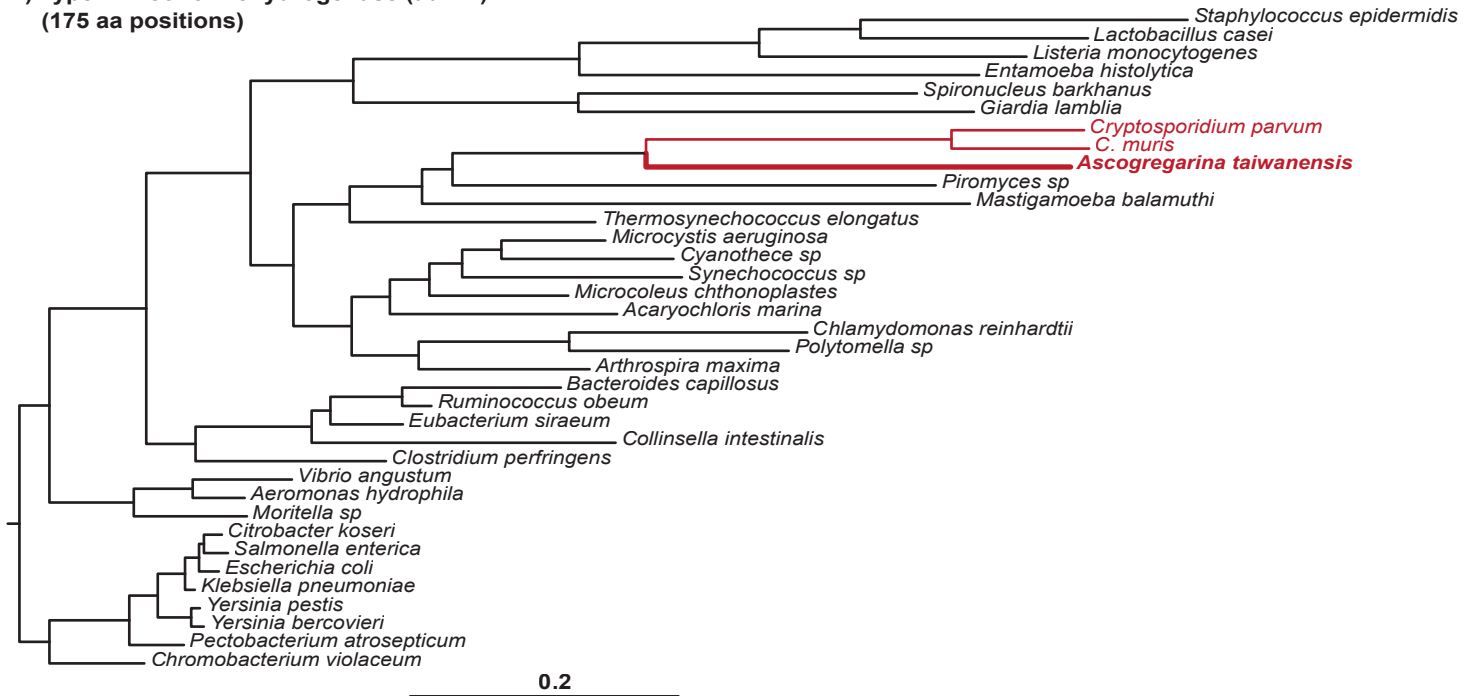

**B) D-Lactate Dehydrogenase (D-LDH)**  
(76 aa positions)

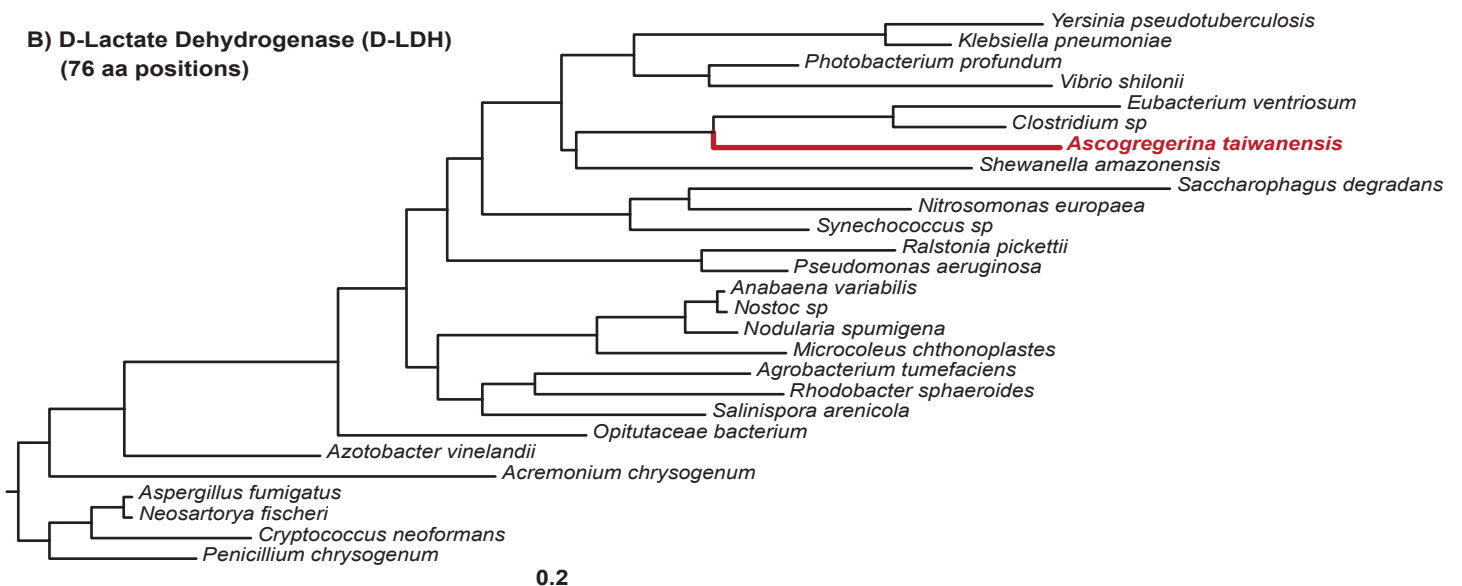

Figure S1 (A-F). Bacterial-affinity of selected Ascogregarina proteins.

C) Phospho-2-dehydro-3-deoxyheptonate aldolase (218 aa positions)

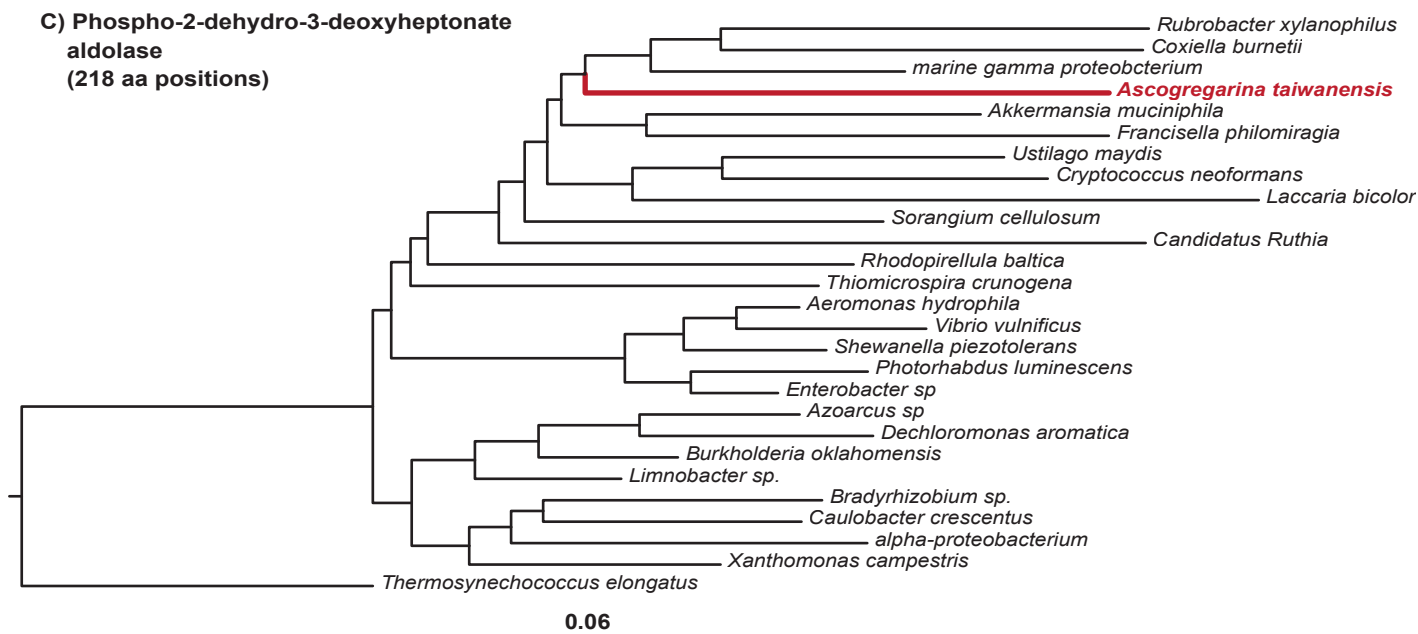

D) Tryptophan synthase (242 aa positions)

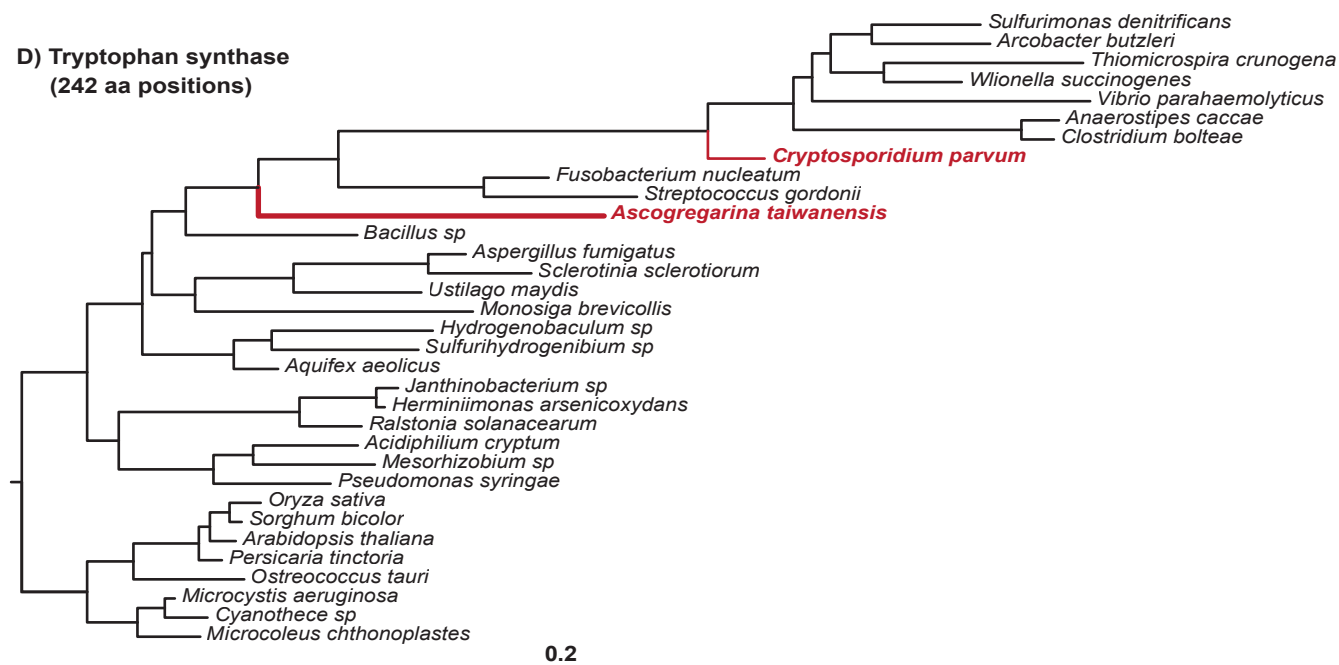

Figure S1 (A-F). Bacterial-affinity of selected Ascogregarina proteins.

E) Indole-3-glycerol-phosphate synthase (I3GPS) (93 aa positions)

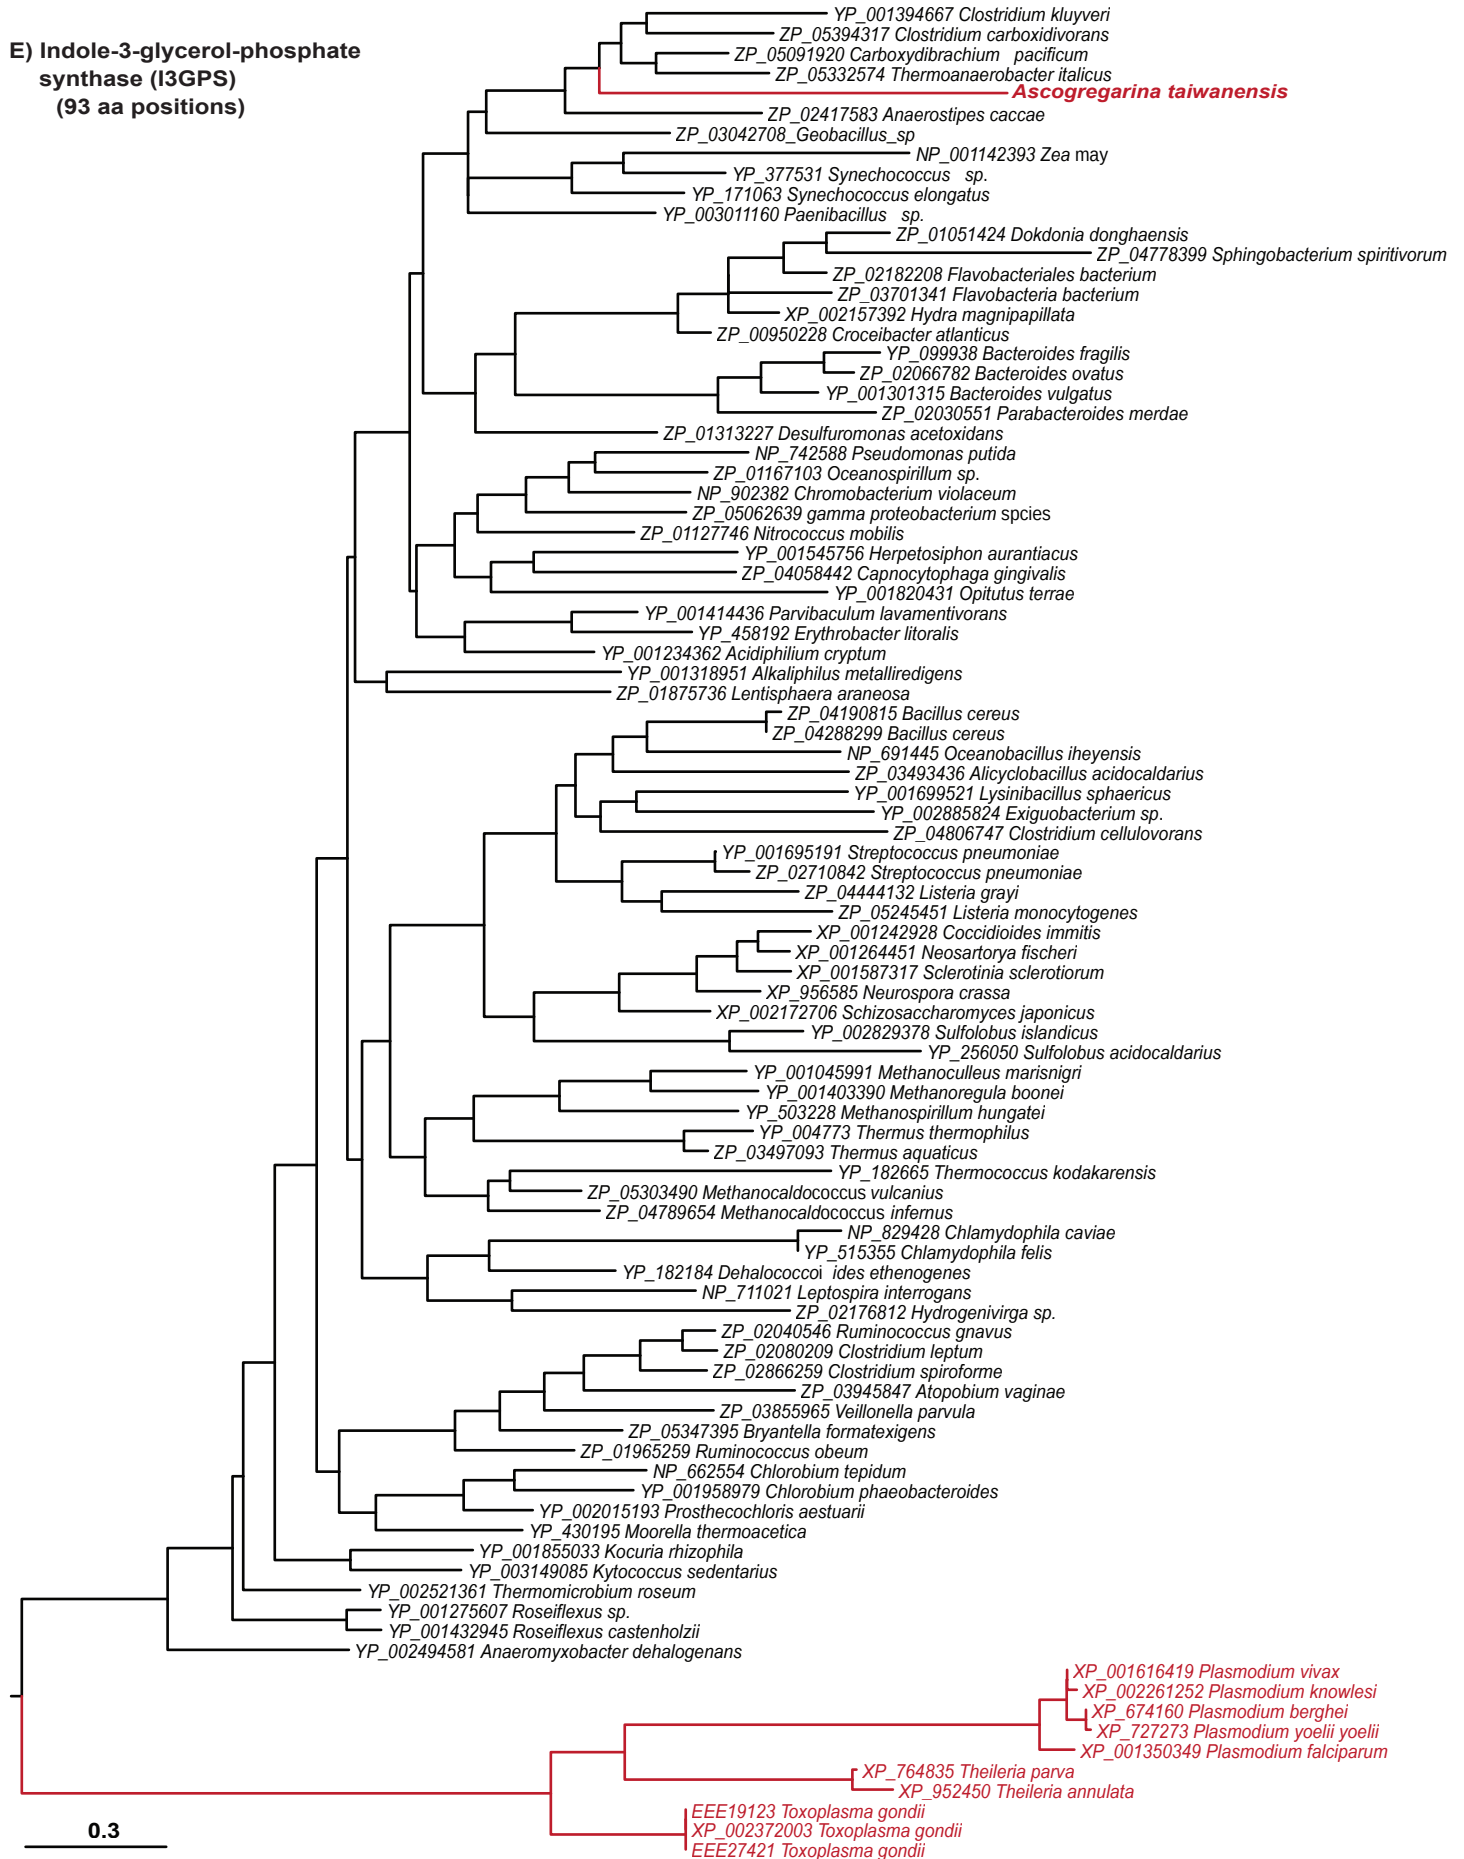

Figure S1 (A-F). Bacterial-affinity of selected Ascogregarina proteins.

F) glutamine amidotransferase class-I  
anthranilate synthase (GAT1-AS)  
(91 aa positions)

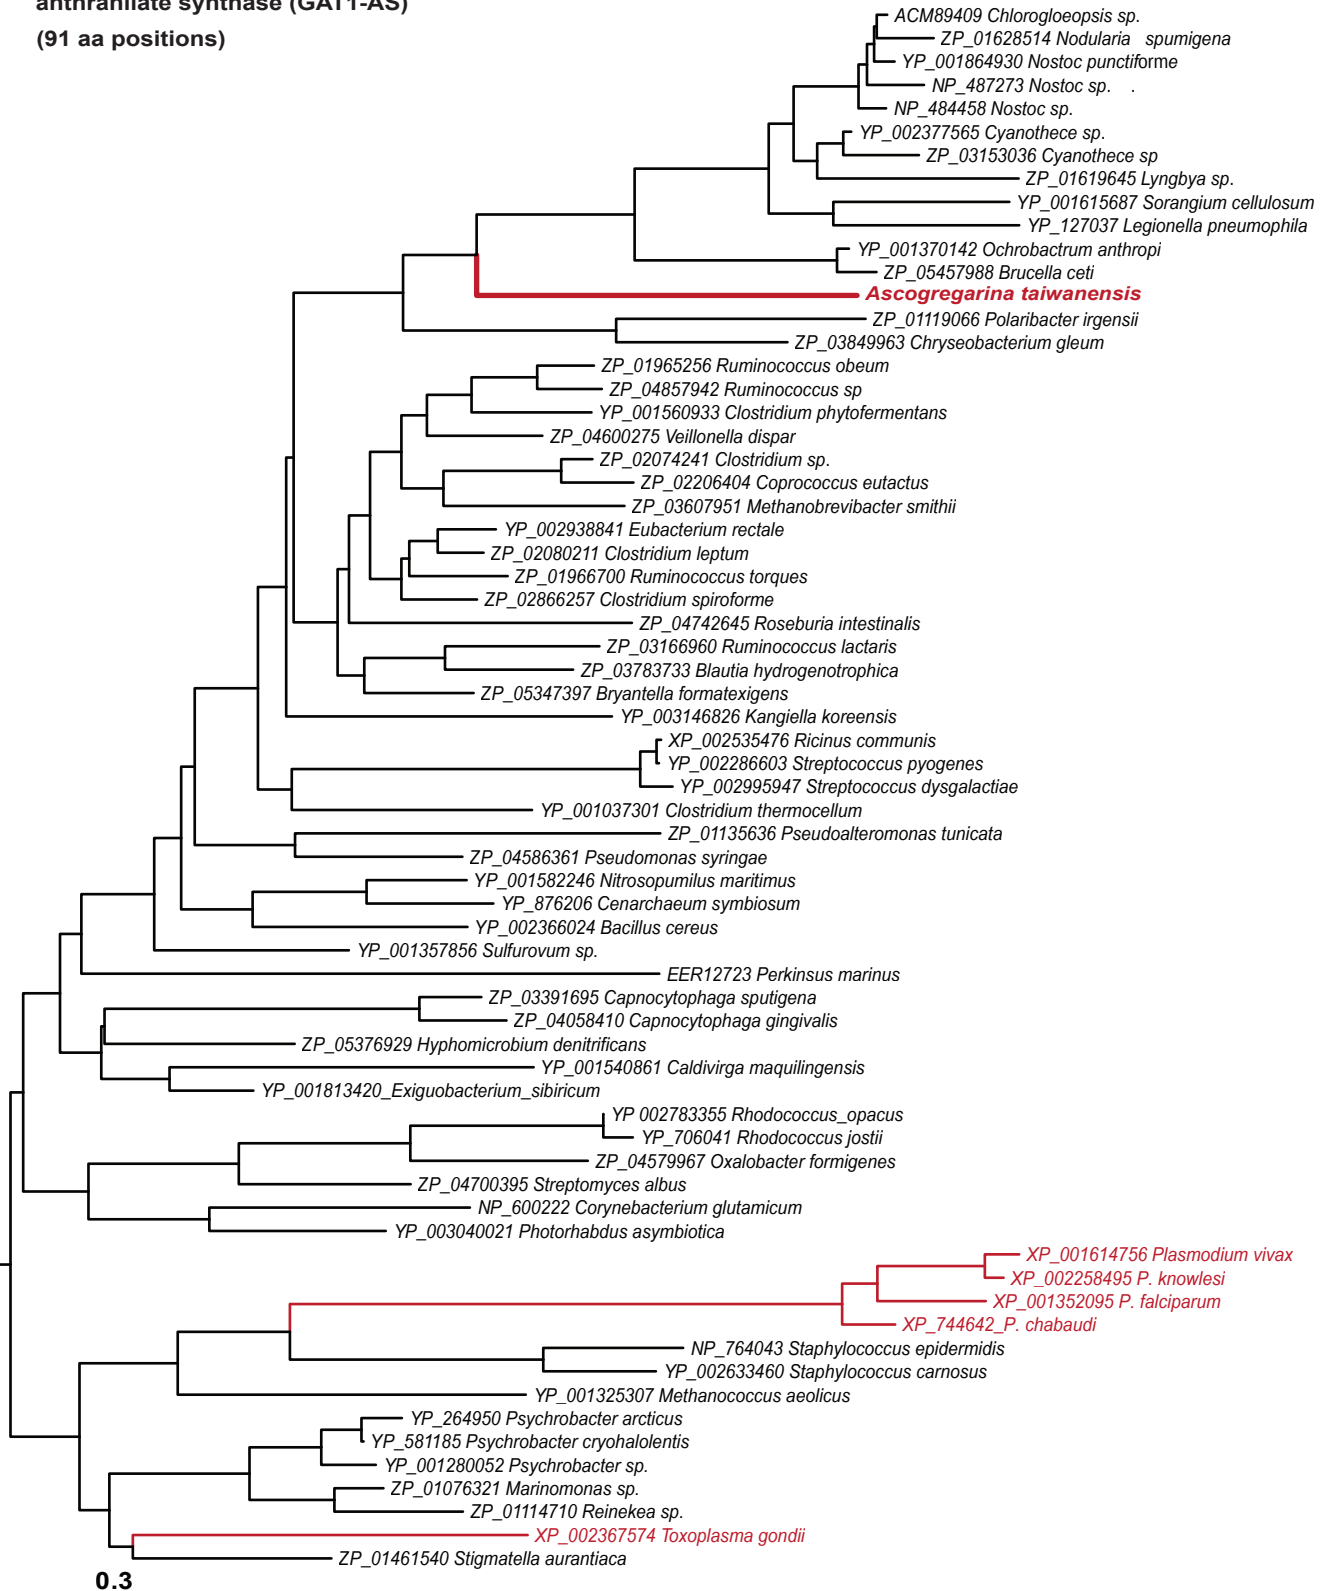

**Figure S1 (G-J).** Plant-affinity of selected Ascogregarina proteins as inferred by maximum likelihood (ML) analysis (with PROML in the PHYLIP package). Best ML trees are inferred using a JTT amino acid substitution model with the consideration of fraction of invariance (Finv) and 4-rate gamma distribution. Sequences were added randomly with 10 jumps of searches and enabled global rearrangement.

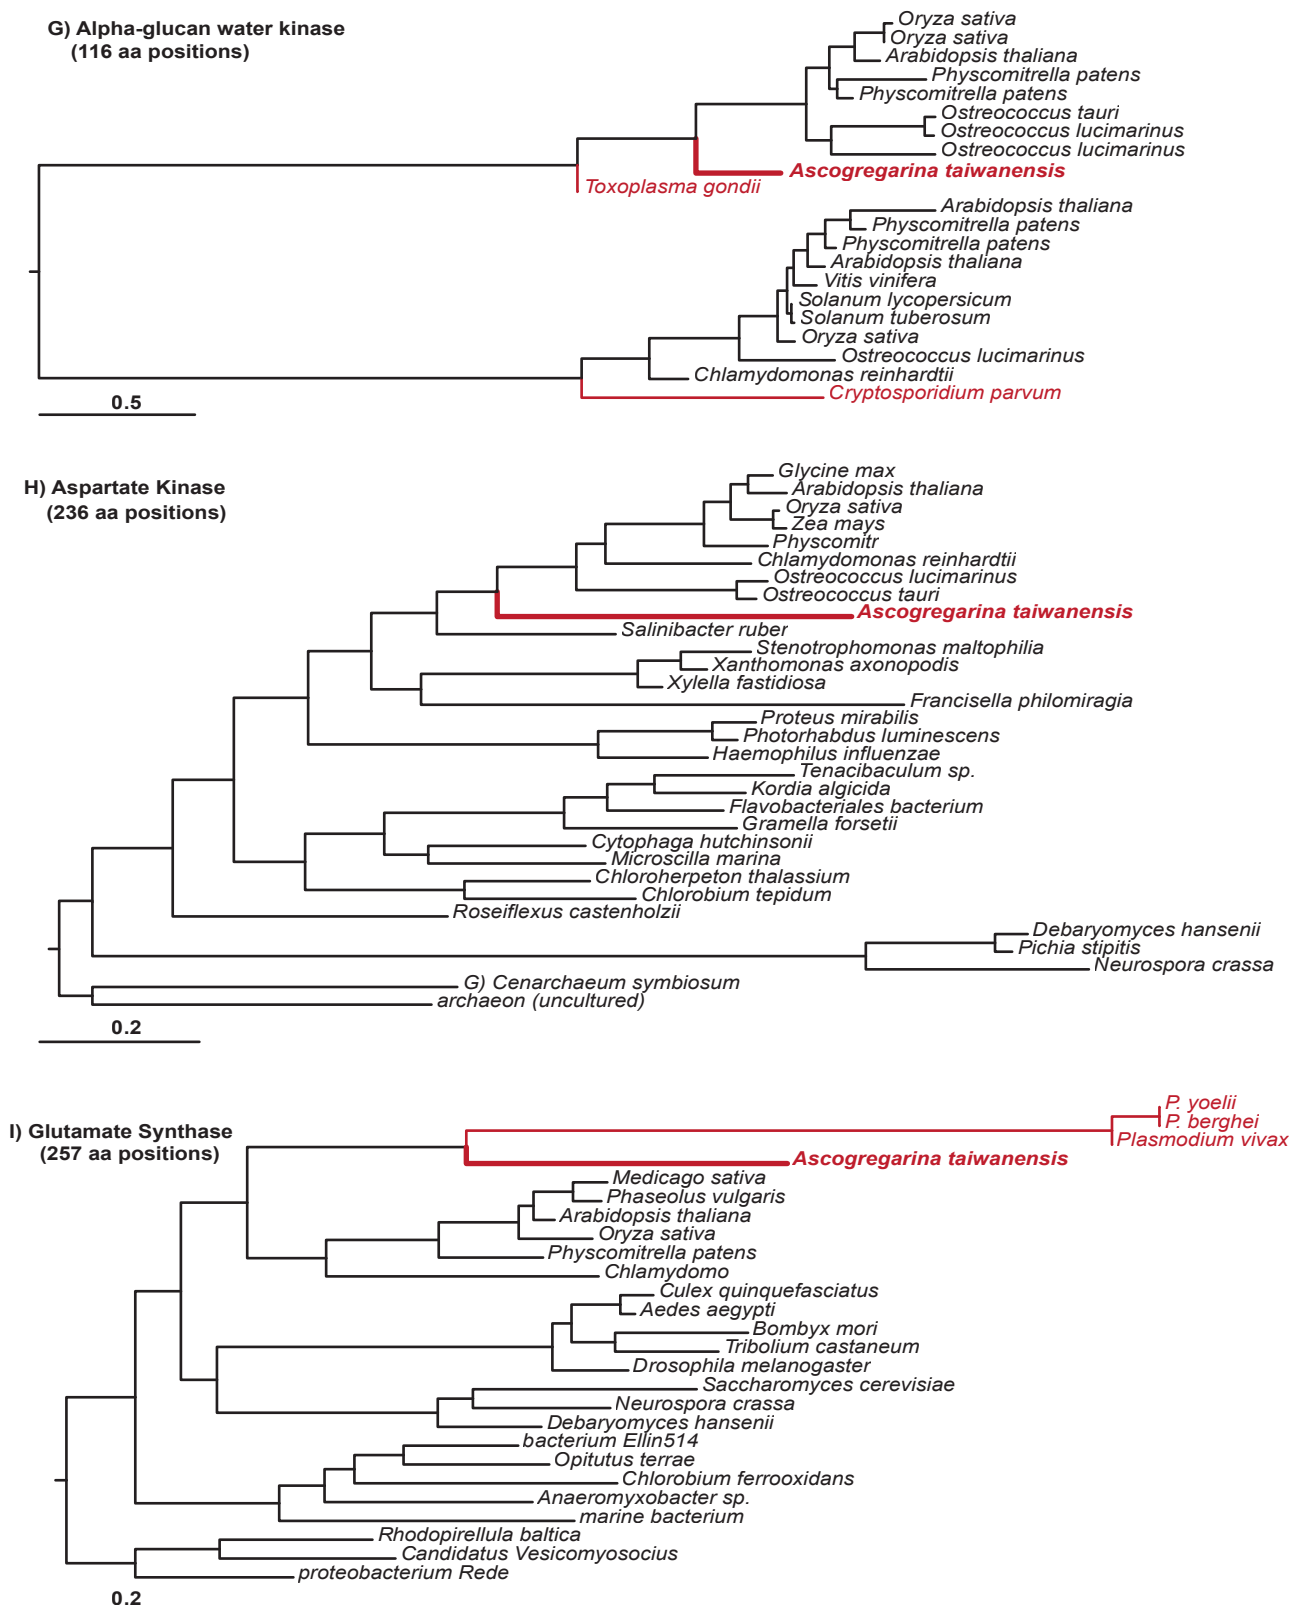

**Figure S1 (G-J). Plant-affinity of selected Ascogregarina proteins**

**J) Trehalose-6-P synthase  
(218 aa positions)**

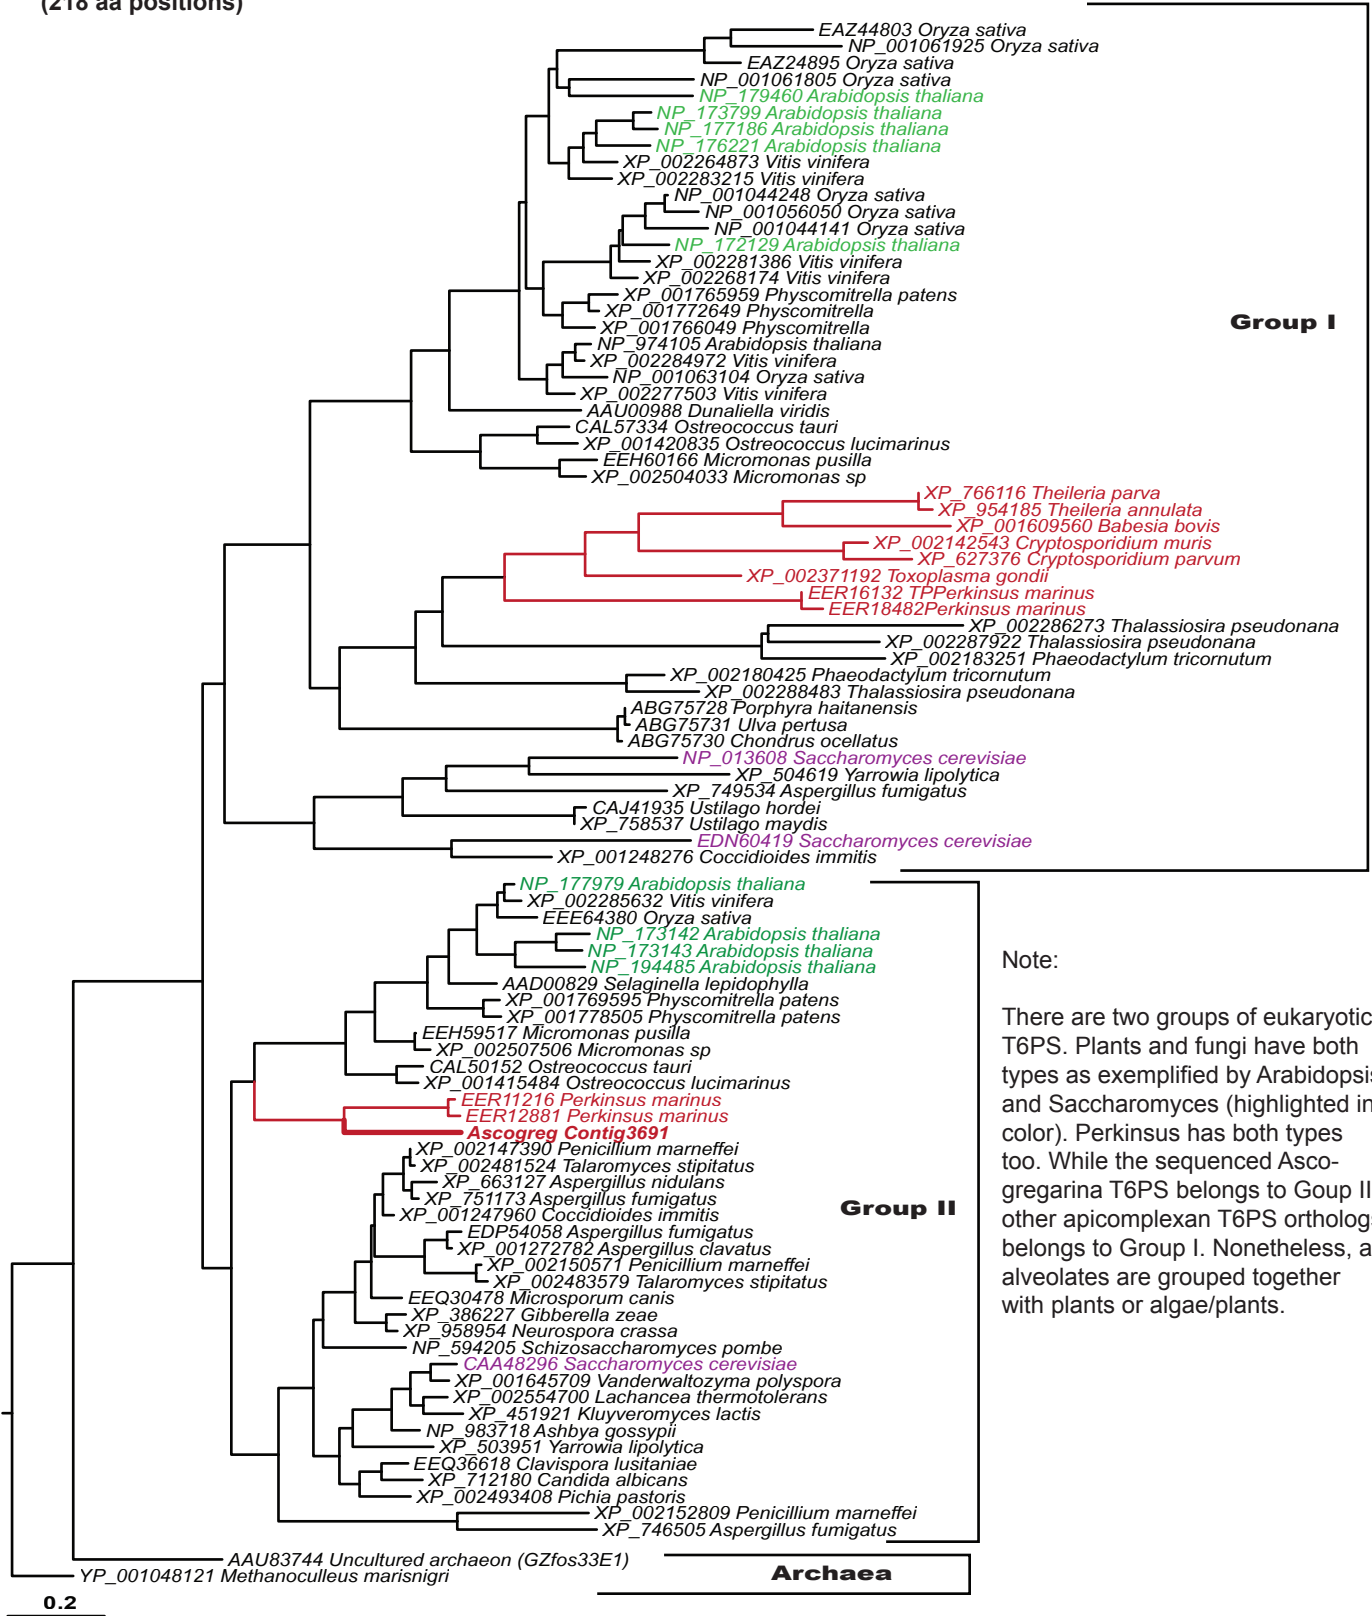

Supplement: msp226_1.pdf [file msp226_1.pdf]
