# Supplementary material
Source: PubMed Central journal article supplement (PMC2877549)
Supplement: msp226_2.pdf [file msp226_2.pdf]

## Templeton et al. Fig. S2.

Evidence of intron presence in *Ascogregarina* genes of bacterial affinity in by BLAST search. Three examples are given below with only top hits listed. The presence of introns are indicated by the gaps between aligned fragments and sometimes by the stop codons within aligned sequences.

### A) Top hit in BLAST search for contig 2623:

```
>ref|ZP_01101351.1| phospho-2-dehydro-3-deoxyheptonate aldolase, phe-sensitive [gamma
proteobacterium KT 71]
gb|EAQ99452.1| phospho-2-dehydro-3-deoxyheptonate aldolase, phe-
sensitive [Congregibacter litoralis KT71] Length=352
```

```
Score = 35.8 bits (81), Expect(3) = 3e-29
Identities = 16/26 (61%), Positives = 20/26 (76%), Gaps = 0/26 (0%) Frame = -1
```

```
Query 1002 QLATGSTRIMGVMIESNLYEGGQQLI 925
          Q+A GS I G+MIESNL EG QN++
Sbjct 288 QVARGSRISIFGIMIESNLVEGRQNVV 313
```

```
Score = 79.7 bits (195), Expect(3) = 3e-29
Identities = 39/54 (72%), Positives = 42/54 (77%), Gaps = 0/54 (0%) Frame = -1
```

```
Query 1605 GAIGARTSEQLHRELASGLSMPVGFKNKGTGDDVQVAVDACVSVKHPHTFLGVS 1444
          GAIGART+E Q HRELASGLS PVGFKN T GDVQVA+DA S PH FL V+
Sbjct 160 GAIGARTTESQTHRELASGLSMPVGFKNATGDVQVAIDAINSASQPHRFLSVT 213
```

```
Score = 58.9 bits (141), Expect(3) = 3e-29
Identities = 36/112 (32%), Positives = 51/112 (45%), Gaps = 23/112 (20%) Frame = -2
```

```
Query 1421 RFF*ITKQGLPAICHSTV*ASSQIHRN*NSPYSMYAIH*GNPDCHIILRGASSGPNYSEA 1242
          RF +TKQG AI +T GN DCHIILRG PNY
Sbjct 208 RFLSVTKQGHSAIFQTT-----GNADCHIILRGGKH-PNYDMF 244
```

```
Query 1241 HIEAAATLLERGGCSARLVVDFSHGNSQKVRATSVITCFRITKDRKMSARQL 1086
          ++ A+ +L + G AR+++D SH NS+K+ A V + +R +
Sbjct 245 SVDDASAMLSKSGLPARIMIDASHANSRKIPARQVDVAMDVASQVARGSRSI 296
```

### B) Top hit in BLAST search for contig 1226:

```
>ref|YP_132940.1| short chain dehydrogenase [Photobacterium profundum SS9]
emb|CAG23140.1| hypothetical dehydrogenase [Photobacterium profundum SS9] Length=275
```

```
Score = 81.3 bits (199), Expect(2) = 2e-17
Identities = 52/164 (31%), Positives = 81/164 (49%), Gaps = 37/164 (22%) Frame = +2
```

```
Query 671 KGCKVTVSASTQEQPNLPGTIYSVAKEVEALGVEALPFKV*CP*CRTDRTHGRCHRREM 850
          +G + ++AKS Q P L GTI+SVA+EVE G AL K+
Sbjct 29 QGANIVIAAKSDQPHPKLSGTIHSVAQEVVEEAGGHALAIKL----- 69
```

```
Query 851 GPVRRXXXXXXXXXXXXXXXX*XT*RQLGVWFGVVLCFWCCRVDIMVANAGALWVKDMVDTPM 1030
          VR + + +Q FG +D++V NA A+ + DT
Sbjct 70 -DVRDEEAVNLAM-----QQAFETFG-----SIDVLVNNASAIVLTRLQDQDT 111
```

Query 1031 RRYDLINDVNARATFACAKAVLPHMLRQKHGHIITMSPPLSFFS 1162  
+R+DLIN +N R +F C+KA +P++ + ++ HIIT+SPP++ S  
Sbjct 112 KRFDLINSINVRGSFVCSKAAIPYLKKS RNPHIITLSPPINLAS 155

Score = 33.5 bits (75), Expect(2) = 2e-17  
Identities = 16/27 (59%), Positives = 18/27 (66%), Gaps = 0/27 (0%) Frame = +1

Query 469 LAGQVAIITGASRGIGREVALAYAAAAG 549  
L G ITG+SRGIGRE+AL A G  
Sbjct 4 LTGVTVFITGSSRGIGREIALICAQOG 30

### C) Top hit in BLAST search for contig 3330:

>ref|ZP\_01308644.1| Propionyl-CoA carboxylase [Oceanobacter sp. RED65]  
gb|EAT10723.1| Propionyl-CoA carboxylase [Oceanobacter sp. RED65] Length=535

Score = 140 bits (353), Expect(2) = 1e-54  
Identities = 76/163 (46%), Positives = 95/163 (58%), Gaps = 29/163 (17%) Frame = +3

Query 474 VGSEAERSGIAKHGAKLVTAVSCAAVPKITVIVGASFGAGNYAMCGRAYDPRFLFSWPNA 653  
VGS+ E+ GIAKHGAK+V AV+CA VPK T+++G SFGAGNY MCGRAYDP F++ WPNA  
Sbjct 381 VGSKYEQEGIAKHGAKMVNAVACAKVPKFTMVIGGSFGAGNYMCGRAYDPNFMWMPNA 440

Query 654 RVGVMGGQQAAGMPSLCTNMALAV\*MF\*WKWSAVASPNMKKIPRN\*RLP\*ISAE\*VSPL 833  
R+ VMGG+QAAG+ +L T A K S +  
Sbjct 441 RISVMGGEQAAGVMALITKGAK-----KRGEPPFSEQD----- 473

Query 834 HLSRGF\*AEVTAVYEQQSYAEYGSARLWDDAVIQPKQTRQVRG 962  
F A + YEQ+ + Y SARLWDD VI P Q+R+V G  
Sbjct 474 --EAAFKAPLLEKYEQEGHPYYASARLWDDGVIDPAQSREVLG 514

Score = 99.8 bits (247), Expect(2) = 1e-54  
Identities = 54/124 (43%), Positives = 78/124 (62%), Gaps = 13/124 (10%) Frame = +2

Query 65 EVAEIIIEPPRDCEEEELDLIAPLGFQWKVSGVKLLSRLLDGSHFAEFKPEFGTSLVTGWG 244  
+VA+++ P EE L+ P + K V +++R++DGS F E+K FG SLV G+  
Sbjct 275 DVADVAVAPLYPAEEIYGLV-PSDLK-KPMDVHEIARIIVDGSSEFDEYKARFGNSLVCGFA 332

Query 245 KIMGHPVGGLKYIHNKSVGILANSVGLTCDAAVKGTHFIQLCCSRQTPLLFLQNTGFMV 424  
+I G+PVG I+AN+G+L ++A KG +FI+LCC R PL+FLQNTGFMV  
Sbjct 333 RIYGYPVG-----IIANAGILFSESAQKGANFIELCCQRNIPLVFLQNTGFMV 381
