# Supplementary material
Source: PubMed Central journal article supplement (PMC2877549)
Supplement: msp226_3.pdf [file msp226_3.pdf]

Supplementary Table S1

| Gene                               | Intron1 | Top Hit                    | Api <sup>2</sup> | Group <sup>3</sup> | Group <sup>4</sup>                                                                    | Api <sup>5</sup>                                                                      |
|------------------------------------|---------|----------------------------|------------------|--------------------|---------------------------------------------------------------------------------------|---------------------------------------------------------------------------------------|
| tRNA syn asn                       | y       | <i>Plasmodium</i>          | 7                | Ap                 |    |    |
| tRNA syn ser                       | y       | <i>Cryptosporidium</i>     | 4                | F, Ap              |    |    |
| tRNA syn glu                       | y       | <i>Ashbya</i>              | 4                | F, Ap              |    |    |
| tRNA syn val 1                     | y       | <i>Strongylocentrotus</i>  | 3                | A                  |    |    |
| tRNA syn phe-A1                    | y       | <i>Gibberella</i>          | 2                | E                  |    |    |
| tRNA syn asp                       | y       | <i>Cryptosporidium</i>     | 2                | F                  |    |    |
| tRNA syn trp                       | y       | <i>Cryptosporidium</i>     | 2                | A                  |    |    |
| tRNA syn lys                       | y       | <i>Cryptosporidium</i>     | 2                | A                  |    |    |
| tRNA syn ala                       | y       | <i>Bombyx</i>              | 2                | F                  |    |    |
| tRNA syn val 2                     |         | <i>Aedes</i>               | 1                | A                  |    |    |
| tRNA syn lys                       |         | <i>Rhizobium</i>           | 0                | B                  |    |    |
| tRNA syn phe-B1                    |         | <i>Anopheles</i>           | 0                | A                  |    |    |
| S15 mito                           | y       | <i>Theileria</i>           | 5 <sup>6</sup>   | Ap                 |   |   |
| S16                                | y       | <i>Theileria</i>           | 4 <sup>6</sup>   | Ap                 |   |   |
| L21 50S                            | y       | <i>Theileria</i>           | 2 <sup>6</sup>   | Ap                 |   |   |
| S17                                | y       | <i>Plasmodium</i>          | 2 <sup>6</sup>   | Ap                 |   |   |
| P1                                 |         | <i>Neospora</i>            | 9                | Ap                 |   |   |
| S7                                 |         | <i>Theileria</i>           | 8                | Ap                 |   |   |
| L12                                | y       | <i>Plasmodium</i>          | 8                | Ap                 |   |   |
| S5                                 | y       | <i>Theileria</i>           | 7                | Ap                 |   |   |
| L23                                |         | <i>Cryptosporidium</i>     | 6                | Ap, F              |   |   |
| L3                                 |         | <i>Micromalthus</i>        | 6                | Ap, A              |   |   |
| L5                                 | y       | <i>Eimeria</i>             | 6                | Ap                 |   |   |
| S2                                 | y       | <i>Plasmodium</i>          | 5                | Ap, A              |   |   |
| L7A 1                              | y       | <i>Theileria</i>           | 4                | Ap, A              |   |   |
| L40                                |         | <i>Theileria</i>           | 4                | F, Ap              |   |   |
| L7A 2                              | y       | <i>Cryptosporidium</i>     | 4                | A, Ap              |   |   |
| L21                                |         | <i>Cryptosporidium</i>     | 4                | Ap, F, P           |   |   |
| S9                                 |         | <i>Cyanophora</i>          | 3                | F, Ap              |   |   |
| L4                                 |         | <i>Oryza</i>               | 3                | P, Ap              |   |   |
| L7                                 | y       | <i>Ashbya</i>              | 3                | Ap, P              |   |   |
| S27                                | y       | <i>Coprinopsis</i>         | 2                | E                  |   |   |
| S3A                                | y       | <i>Oryza</i>               | 2                | P                  |   |   |
| S8                                 | y       | <i>Cryptosporidium</i>     | 2                | P, Ap              |   |   |
| S13                                |         | <i>Cryptosporidium</i>     | 2                | E                  |   |   |
| S18                                |         | <i>Theileria</i>           | 2                | E                  |   |   |
| S29                                |         | <i>Plasmodium</i>          | 1                | A                  |   |   |
| L13                                |         | <i>Schizosaccharomyces</i> | 1                | E                  |   |   |
| L1 Bacterial                       | y       | <i>Nocardioides</i>        | 0                | B                  |   |   |
| S4                                 |         | <i>Pan</i>                 | 0                | A                  |   |   |
| L7/L12                             |         |                            |                  |                    |   |   |
| glutamate dehydrogenase            |         | <i>Plasmodium</i>          | 9                | Ap, B              |  |  |
| glutamate dehydrogenase            |         | <i>Theileria</i>           | 7                | Ap                 |  |  |
| splicing factor 3b subunit 3       | y       | <i>Plasmodium</i>          | 7                | Ap                 |  |  |
| glycerol-3-phosphate dehydrogenase | y       | <i>Theileria</i>           | 6                | Ap                 |  |  |
| sec61                              | y       | <i>Plasmodium</i>          | 6                | Ap                 |  |  |

Supplementary Table S1 continued.

| Gene                                             | Intron <sup>1</sup> | Top Hit                  | Api <sup>2</sup> | Group <sup>3</sup> | Group <sup>4</sup> | Api <sup>5</sup> |
|--------------------------------------------------|---------------------|--------------------------|------------------|--------------------|--------------------|------------------|
| formate/nitrite transporter                      | y                   | <i>Toxoplasma</i>        | 6                | Ap, B              |                    |                  |
| nitrate reductase                                |                     | <i>Plasmodium</i>        | 4                | Ap, P              |                    |                  |
| dihydrolipoamide branched chain transacetylase   | y                   | <i>Leishmania</i>        | 4                | P, Ap              |                    |                  |
| enolase 2                                        |                     | <i>Plasmodium</i>        | 3                | Ap, P              |                    |                  |
| glycine cleavage system H protein                | y                   | <i>Thermotoga</i>        | 1                | B, E               |                    |                  |
| tat interactive protein 2                        |                     | <i>Danio</i>             | 0                | A                  |                    |                  |
| glyceraldehyde 3-phosphate dehydrogenase         |                     | <i>Lithobius</i>         | 0                | A                  |                    |                  |
| proline oxidase                                  |                     | <i>Canis</i>             | 0                | A                  |                    |                  |
| polyethylene glycol dehydrogenase                |                     | <i>Apis</i>              | 0                | A, B               |                    |                  |
| probable NADH-dependent dehydrogenase            |                     | <i>Blastopirellula</i>   | 0                | B                  |                    |                  |
| saccharopine dehydrogenase                       |                     | <i>Rhodococcus</i>       | 0                | B                  |                    |                  |
| short chain dehydrogenase                        | y                   | <i>Photobacterium</i>    | 0                | B                  |                    |                  |
| acyl-CoA dehydrogenase                           |                     | <i>Mycobacterium</i>     | 0                | B                  |                    |                  |
| 10 kDa inner membrane protein                    |                     | <i>Xanthobacter</i>      | 0                | B                  |                    |                  |
| oxidoreductase                                   |                     | <i>Bradyrhizobium</i>    | 0                | B                  |                    |                  |
| cysteine synthase                                |                     | <i>Rhodobacter</i>       | 0                | B                  |                    |                  |
| D-3-phosphoglycerate dehydrogenase               |                     | <i>Synechococcus</i>     | 0                | B                  |                    |                  |
| histidinol dehydrogenase                         |                     | <i>Methanosarcina</i>    | 0                | B                  |                    |                  |
| alpha/beta hydrolase                             |                     | <i>Rhodofera</i>         | 0                | B                  |                    |                  |
| beta-ketoacyl synthase                           |                     | <i>Herpetosiphon</i>     | 0                | B                  |                    |                  |
| formylmethanofuran dehydrogenase                 |                     | <i>Rubrivivax</i>        | 0                | B                  |                    |                  |
| 2-oxoglutarate dehydrogenase                     |                     | <i>Acidovorax</i>        | 0                | B                  |                    |                  |
| 3-hydroxyacyl-CoA dehydrogenase                  |                     | <i>Polaromonas</i>       | 0                | B                  |                    |                  |
| D-lactate dehydrogenase                          |                     | <i>Photobacterium</i>    | 0                | B                  |                    |                  |
| male sterility-like                              |                     | <i>Polaromonas</i>       | 0                | B                  |                    |                  |
| DTDP-4-hydroxymannose 3,5-epimerase              |                     | <i>Azoarcus</i>          | 0                | B                  |                    |                  |
| aldehyde reductase                               | y                   | <i>Pseudoalteromonas</i> | 0                | B, E               |                    |                  |
| dihydroorotate dehydrogenase                     |                     | <i>Rattus</i>            | 0                | B, E               |                    |                  |
| 17-beta-hydroxysteroid dehydrogenase             | y                   | <i>Tetrahymena</i>       | 0                | E                  |                    |                  |
| electron-transferring-flavoprotein dehydrogenase | y                   | <i>Acidiphilium</i>      | 0                | E                  |                    |                  |
| phosphoglycerate dehydrogenase                   |                     | <i>Burkholderia</i>      | 0                | E, B               |                    |                  |
| methylmalonate-semialdehyde dehydrogenase        |                     | <i>Tetrahymena</i>       | 0                | E, B               |                    |                  |
| FAD-binding oxidase                              | y                   | <i>Aspergillus</i>       | 0                | E, B               |                    |                  |
| MaoC like domain-containing protein              |                     | <i>Tetrahymena</i>       | 0                | F                  |                    |                  |
| dihydrolipoyl dehydrogenase                      | y                   | <i>Aspergillus</i>       | 0                | F                  |                    |                  |
| translation initiation factor eIF-6              | y                   | <i>Candida</i>           | 0                | F                  |                    |                  |
| glycine dehydrogenase                            | y                   | <i>Magnaporthe</i>       | 0                | F, B               |                    |                  |
| 1,3-beta-glucan synthase                         |                     | <i>Arabidopsis</i>       | 0                | P                  |                    |                  |
| alcohol dehydrogenase class 3                    | y                   | <i>Oryza</i>             | 0                | P                  |                    |                  |
| acyl carrier protein reductase                   |                     | <i>Tetrahymena</i>       | 0                | P                  |                    |                  |
| aspartokinase-homoserine dehydrogenase           |                     | <i>Ostreococcus</i>      | 0                | PcP, B             |                    |                  |
| aspartokinase-homoserine dehydrogenase           | y                   | <i>Ostreococcus</i>      | 0                | PcP, B             |                    |                  |
| aspartokinase-homoserine dehydrogenase           |                     | <i>Salinibacter</i>      | 0                | PcP, B             |                    |                  |
| aspartokinase-homoserine dehydrogenase           |                     | <i>Salinibacter</i>      | 0                | PcP, B             |                    |                  |
| histidinol-phosphate aminotransferase            | y                   | <i>Chloroflexus</i>      | 0                | PcP, B             |                    |                  |

<sup>1</sup>Genes in which introns were detected. Because many of the genes are fragments, there might be introns which were not detected due to the incompleteness of the nucleotide sequence information.

<sup>2</sup>Number of apicomplexans in the top 10 hits.

<sup>3</sup>Predominant group of the top hits: A, Animal; B, bacteria; F, Fungi; Ap, Apicomplexa; P, Plant; E, eukaryote; Pcp, chloroplast.

<sup>4</sup>Predominant group of the top hits: red, Bikonts; green, Unikonts; blue, bacteria; purple, eukaryote; brown, all organisms; white, suspected contaminant.

<sup>5</sup>Number of apicomplexans in the top 10 hits in gray scale with darker boxes indicating higher number of hits.

<sup>6</sup>Of these hits all were apicomplexan.

<sup>7</sup>Only 6 hits, of which 4 were apicomplexan, 1 chloroplast, and 1 bacterial.

<sup>8</sup>This hit spanned a very short region of good homology.

Supplementary Table S1 continued.

| Gene                                              | Intron1 | Top Hit                      | Api <sup>2</sup> | Group <sup>3</sup> | Group <sup>4</sup>                                                                    | Api <sup>5</sup>                                                                      |
|---------------------------------------------------|---------|------------------------------|------------------|--------------------|---------------------------------------------------------------------------------------|---------------------------------------------------------------------------------------|
| polyketide synthase                               | y       | <i>Cryptosporidium</i>       | 5                | Ap, B              |    |    |
| type I fatty acid synthase                        |         | <i>Toxoplasma</i>            | 7                | Ap                 |    |    |
| type I fatty acid synthase                        |         | <i>Toxoplasma</i>            | 8                | Ap                 |    |    |
| type I fatty acid synthase                        |         | <i>Toxoplasma</i>            | 8                | Ap                 |    |    |
| type I fatty acid synthase                        |         | <i>Toxoplasma</i>            | 8                | Ap                 |    |    |
| type I fatty acid synthase                        |         | <i>Toxoplasma</i>            | 8                | Ap                 |    |    |
| type I fatty acid synthase                        |         | <i>Toxoplasma</i>            | 5                | Ap, B              |    |    |
| type I fatty acid synthase                        | y       | <i>Toxoplasma</i>            | 6                | Ap, B              |    |    |
| type I fatty acid synthase                        | y       | <i>Toxoplasma</i>            | 5                | Ap, B              |    |    |
| type I fatty acid synthase                        |         | <i>Toxoplasma</i>            | 4                | Ap, B              |    |    |
| type I fatty acid synthase                        |         | <i>Toxoplasma</i>            | 4                | Ap, B              |    |    |
| type I fatty acid synthase                        |         | <i>Toxoplasma</i>            | 4                | Ap, B              |    |    |
| glucosamine-fructose-6-phosphate aminotransferase | y       | <i>Plasmodium</i>            | 6                | Ap, B              |    |    |
| ribulose phosphate isomerase                      |         | <i>Pavlova</i>               | 5                | Pcp, Ap            |    |    |
| ribose-5-phosphate isomerase                      |         | <i>Arabidopsis</i>           | 4                | Pcp, Ap            |    |    |
| glucosamine-fructose-6-phosphate aminotransferase |         | <i>Cryptosporidium</i>       | 3                | B, E               |    |    |
| peptidylprolyl isomerase                          |         | <i>Arabidopsis</i>           | 1                | E                  |   |   |
| ketol-acid reductoisomerase                       |         | <i>delta proteobacterium</i> | 0                | Pcp                |  |  |
| 6-phosphogluconolactonase                         | y       | <i>Yersina</i>               | 0                | B                  |  |  |

<sup>1</sup>Genes in which introns were detected. Because many of the genes are fragments, there might be introns which were not detected due to the incompleteness of the nucleotide sequence information.

<sup>2</sup>Number of apicomplexans in the top 10 hits.

<sup>3</sup>Predominant group of the top hits: A, Animal; B, bacteria; F, Fungi; Ap, Apicomplexa; P, Plant; E, eukaryote; Pcp, chloroplast.

<sup>4</sup>Predominant group of the top hits: red, Bikonts; green, Unikonts; blue, bacteria; purple, eukaryote; brown, all organisms; white, suspected contaminant.

<sup>5</sup>Number of apicomplexans in the top 10 hits in gray scale with darker boxes indicating higher number of hits.

<sup>6</sup>All of these hits all were apicomplexan.

<sup>7</sup>Only 6 hits, of which 4 were apicomplexan, 1 chloroplast, and 1 bacterial.

<sup>8</sup>This hit spanned a very short region of good homology.
